# Supplementary material for: Construction and Analysis of a ceRNA Network in Cardiac Fibroblast During Fibrosis Based on in vivo and in vitro Data
Source: PubMed Central journal article supplement (PMC7859616; doi:10.3389/fgene.2020.503256), 2021-01-21
Supplement: Presentation_1.pdf [file Presentation_1.pdf]

## *Supplementary Material*

**Supplementary Figure 1.** The heatmap for top100 DE-mRNA in GSE97358.

**Supplementary Figure 2.** The heatmap for top100 DE-mRNA in GSE116250.

**Supplementary Figure 3.** The heatmap for 39 DE-lncRNA in GSE97358.

**Supplementary Figure 4.** The heatmap for 93 DE-lncRNA in GSE116250.

**Supplementary Figure 5.** The knockdown efficiency of siRNA targeting LINC00511 and LncRNA-SNHG15 in PBS-treated HCFs and TGF $\beta$ 1-treated HCFs. (A) The knockdown efficiency of siRNA-LINC00511. (B) The knockdown efficiency of siRNA-SNHG15. \*\*, P<0.01; \*\*\*, P<0.001

**Supplementary Figure 6.** Supplementary results based on cardiac fibroblasts-specific DE-mRNAs in the ceRNA network (*ADAM19* and *TGFBI*). (A) ES of cell cycle for *ADAM19* in GSE97358 dataset. (B) ES of cytokine-cytokine receptor interaction for *ADAM19* in GSE97358 dataset. (C) ES of cell cycle for *ADAM19* in GSE116250 dataset. (D) ES of cytokine-cytokine receptor interaction for *ADAM19* in GSE116250 dataset. (E) ES of cell cycle for *TGFBI* in GSE97358 dataset. (F) ES of cytokine-cytokine receptor interaction for *TGFBI* in GSE97358 dataset. (G) ES of cell cycle for *TGFBI* in GSE116250 dataset. (H) ES of cytokine-cytokine receptor interaction for *TGFBI* in GSE116250 dataset. (I) ES of cytokine-cytokine receptor interaction for *TGFBI* in GSE116250 dataset.

**Table S1.** List of PCR primers sequence used in this study

| Gene                          | Primer                        | Sequence (5'-3')                                            |
|-------------------------------|-------------------------------|-------------------------------------------------------------|
| <i>miR-25-3p</i>              | Forward                       | ATACATTGCACTTGTCTCG                                         |
|                               | Reverse                       | CATTGCACTTGTCTCGGTCTGA                                      |
| <i>miR-32-5p</i>              | Reverse<br>Transcription (RT) | GTCGTATCCAGTGCGTGTCGTGGAGTCG<br>GCAATTGCACTGGATACGACTCAGACC |
|                               | Forward                       | CGGTATTGCACATTACTAAG                                        |
|                               | Reverse                       | TATTGCACATTACTAAGTTGCA                                      |
| <i>miR-92a-3p<sup>#</sup></i> | RT                            | GTCGTATCCAGTGCGTGTCGTGGAGTCG<br>GCAATTGCACTGGATACGACTGCAACT |
|                               | Forward                       | CCCTATTGCACTTGTCCCG                                         |
|                               | Reverse                       | TATTGCACTTGTCCCGGCCTGT                                      |
| <i>miR-367-3p</i>             | RT                            | GTCGTATCCAGTGCGTGTCGTGGAGTCG<br>GCAATTGCACTGGATACGACACAGGCC |
|                               | Forward                       | CCGAATTGCACTTTAGCAATG                                       |
|                               | Reverse                       | AATTGCACTTTAGCAATGGTGA                                      |
| <i>miR-26b-5p</i>             | RT                            | GTCGTATCCAGTGCGTGTCGTGGAGTCG<br>GCAATTGCACTGGATACGACTCACCAT |
|                               | Forward                       | CGGATTCAAGTAATTCAGGA                                        |
|                               | Reverse                       | TTCAAGTAATTCAGGATAGGT                                       |
| <i>miR-1297</i>               | RT                            | GTCGTATCCAGTGCGTGTCGTGGAGTCG<br>GCAATTGCACTGGATACGACACCTATC |
|                               | Forward                       | CGGTTCAAGTAATTCAGGTG                                        |
|                               | Reverse                       | TTCAAGTAATTCAGGTG                                           |
|                               | RT                            | GTCGTATCCAGTGCGTGTCGTGGAGTCG<br>GCAATTGCACTGGATACGACCACCTGA |

|                               |         |                                                             |
|-------------------------------|---------|-------------------------------------------------------------|
| <i>miR-30c-5p</i>             | Forward | TGTAAACATCCTACACTCTC                                        |
|                               | Reverse | TGTAAACATCCTACACTCTCAGC                                     |
|                               | RT      | GTCGTATCCAGTGCGTGTCGTGGAGTCG<br>GCAATTGCACTGGATACGACGCTGAGA |
| <i>miR-30a-5p<sup>#</sup></i> | Forward | CCTGTAAACATCCTCGACTG                                        |
|                               | Reverse | TGTAAACATCCTCGACTGGAAG                                      |
|                               | RT      | GTCGTATCCAGTGCGTGTCGTGGAGTCG<br>GCAATTGCACTGGATACGACCTTCCAG |
| <i>miR-153-3p</i>             | Forward | CCTTGCAATAGTCACAAAAGT                                       |
|                               | Reverse | TTGCATAGTCACAAAAGTGATC                                      |
|                               | RT      | GTCGTATCCAGTGCGTGTCGTGGAGTCG<br>GCAATTGCACTGGATACGACGATCACT |
| <i>miR-106b-5p</i>            | Forward | CCTAAAGTGCTGACAGTGCA                                        |
|                               | Reverse | TAAAGTGCTGACAGTGCAGAT                                       |
|                               | RT      | GTCGTATCCAGTGCGTGTCGTGGAGTCG<br>GCAATTGCACTGGATACGACATCTGCA |

| Gene                           | Primer  | Sequence (5'-3')                                            |
|--------------------------------|---------|-------------------------------------------------------------|
| <i>miR-106a-5p<sup>#</sup></i> | Forward | GGAAAAGTGCTTACAGTGCA                                        |
|                                | Reverse | AAAAGTGCTTACAGTGCAGGTAG                                     |
|                                | RT      | GTCGTATCCAGTGCGTGTCGTGGAGTCG<br>GCAATTGCACTGGATACGACCTACCTG |
| <i>miR-874-3p</i>              | Forward | ATATCTGCCCTGGCCCGAG                                         |
|                                | Reverse | CTGCCCTGGCCCGAGGGACCGA                                      |
|                                | RT      | GTCGTATCCAGTGCGTGTCGTGGAGTCG<br>GCAATTGCACTGGATACGACTCGGTCC |
| <i>miR-590-5p</i>              | Forward | AAGAGCTTATTCATAAAAGT                                        |

---

|                   |         |                                                              |
|-------------------|---------|--------------------------------------------------------------|
|                   | Reverse | GAGCTTATTCATAAAAGTGCAG                                       |
|                   | RT      | GTCGTATCCAGTGCGTGTCGTGGAGTCG<br>GCAATTGCACTGGATACGACCTGCACT  |
| <i>miR-9-5p</i>   | Forward | TTTTCTTTGGTTATCTAGCTG                                        |
|                   | Reverse | TCTTTGGTTATCTAGCTGTATGA                                      |
|                   | RT      | GTCGTATCCAGTGCGTGTCGTGGAGTCG<br>GCAATTGCACTGGATACGACTCATACA  |
| <i>miR-26a-5p</i> | Forward | TATTTCAAGTAAT CCAGGATA                                       |
|                   | Reverse | TTCAAGTAATCCAGGATAGGCT                                       |
|                   | RT      | GTCGTATCCAGTGCGTGTCGTGGAGTCG<br>GCAATTGCACTGGATACGACAGCCTAT  |
| <i>miR-124-3p</i> | Forward | ATATAAGGCACGCGGTGAATG                                        |
|                   | Reverse | TAAGGCACGCGGTGAATGCC                                         |
|                   | RT      | GTCGTATCCAGTGCGTGTCGTGGAGTCG<br>GCAATTGCACTGGATACGACGGCATTCA |
| <i>U6</i>         | Forward | CTCGCTTCGGCAGCACA                                            |
|                   | Reverse | AACGCTTCACGAATTTGCG                                          |

---

**Table S2.** List of siRNA sequence used in this study

| <b>Gene</b>        |         | <b>Sequence (5'-3')</b>  |
|--------------------|---------|--------------------------|
| <i>LINC00511-1</i> | Forward | GGGUCGAAUUCUUCAGUUUCUTT  |
|                    | Reverse | AGAAACUGAAGAAUUCGACCCTT  |
| <i>LINC00511-2</i> | Forward | GCUCAAGUUCCUGACAUAAAUTT  |
|                    | Reverse | AUUUAUGUCAGGAACUUGAGCTT  |
| <i>SNHG15-1</i>    | Forward | GCACCUUAAUUGAGCAAGUUUTT  |
|                    | Reverse | AAACUUGCUCAAUUAAGGUGCTT  |
| <i>SNHG15-2</i>    | Forward | GACCUGACCUGAGAGAAGAUATT  |
|                    | Reverse | UAUCUUCUCUCAGGUCAGGUCTT  |
| <i>TGFBI-1</i>     | Forward | UCCUAUUAGUGCCAAUAACCUUTT |
|                    | Reverse | GUUAUUGGCACUAAUAGGAAGTT  |
| <i>TGFBI-2</i>     | Forward | AAGUACUUCCUAUUAGUGCCATT  |
|                    | Reverse | GCACUAAUAGGAAGUACUUCATT  |
| <i>ADAM19-1</i>    | Forward | AAAAGUUGCUCAUUCUUCUCTT   |
|                    | Reverse | GAAGAAUGAGCAACUUUUUGCTT  |
| <i>ADAM19-2</i>    | Forward | AGUAUAAUGGGUUUCUGUGUATT  |
|                    | Reverse | CACAGAAACCCAUUAUACUUCTT  |
| Negative control   | Forward | UUCUCCGAACGUGUCACGUTT    |
|                    | Reverse | ACGUGACACGUUCGGAGAATT    |
